# Supplementary material
Source: PubMed Central journal article supplement (PMC6694821)

Supplementary Table S1a

| <b>GO Categories of Upregulated Genes in HPV16 Cervix</b> |                                                   |                |
|-----------------------------------------------------------|---------------------------------------------------|----------------|
| <b>GO Term</b>                                            | <b>Description</b>                                | <b>P-value</b> |
| GO:0022402                                                | cell cycle process                                | 1.07E-22       |
| GO:1903047                                                | mitotic cell cycle process                        | 2.44E-22       |
| GO:0051276                                                | chromosome organization                           | 5.57E-18       |
| GO:0006259                                                | DNA metabolic process                             | 8.99E-15       |
| GO:0006281                                                | DNA repair                                        | 7.44E-13       |
| GO:0051301                                                | cell division                                     | 2.86E-12       |
| GO:0006260                                                | DNA replication                                   | 1.22E-11       |
| GO:0007067                                                | mitotic nuclear division                          | 1.31E-11       |
| GO:0006996                                                | organelle organization                            | 6.48E-11       |
| GO:0000280                                                | nuclear division                                  | 7.14E-11       |
| GO:0048285                                                | organelle fission                                 | 1.61E-10       |
| GO:0044770                                                | cell cycle phase transition                       | 1.86E-10       |
| GO:0006974                                                | cellular response to DNA damage stimulus          | 3.67E-10       |
| GO:0044772                                                | mitotic cell cycle phase transition               | 2.23E-09       |
| GO:0007059                                                | chromosome segregation                            | 2.60E-09       |
| GO:0051726                                                | regulation of cell cycle                          | 2.64E-09       |
| GO:0007346                                                | regulation of mitotic cell cycle                  | 3.81E-09       |
| GO:0046483                                                | heterocycle metabolic process                     | 5.34E-09       |
| GO:0033554                                                | cellular response to stress                       | 1.02E-08       |
| GO:0006139                                                | nucleobase-containing compound metabolic process  | 1.25E-08       |
| GO:0006725                                                | cellular aromatic compound metabolic process      | 1.47E-08       |
| GO:0007062                                                | sister chromatid cohesion                         | 2.25E-08       |
| GO:0010564                                                | regulation of cell cycle process                  | 4.41E-08       |
| GO:0034641                                                | cellular nitrogen compound metabolic process      | 6.21E-08       |
| GO:0016043                                                | cellular component organization                   | 8.53E-08       |
| GO:0007017                                                | microtubule-based process                         | 9.46E-08       |
| GO:1901360                                                | organic cyclic compound metabolic process         | 1.24E-07       |
| GO:0071840                                                | cellular component organization or biogenesis     | 1.62E-07       |
| GO:0090304                                                | nucleic acid metabolic process                    | 2.15E-07       |
| GO:0044843                                                | cell cycle G1/S phase transition                  | 2.24E-07       |
| GO:0000082                                                | G1/S transition of mitotic cell cycle             | 2.24E-07       |
| GO:0006807                                                | nitrogen compound metabolic process               | 2.34E-07       |
| GO:0036297                                                | interstrand cross-link repair                     | 9.58E-07       |
| GO:0045930                                                | negative regulation of mitotic cell cycle         | 1.03E-06       |
| GO:1901987                                                | regulation of cell cycle phase transition         | 1.13E-06       |
| GO:1903046                                                | meiotic cell cycle process                        | 1.37E-06       |
| GO:0030261                                                | chromosome condensation                           | 1.44E-06       |
| GO:0098813                                                | nuclear chromosome segregation                    | 1.63E-06       |
| GO:0006312                                                | mitotic recombination                             | 2.55E-06       |
| GO:0045786                                                | negative regulation of cell cycle                 | 2.57E-06       |
| GO:0000722                                                | telomere maintenance via recombination            | 3.26E-06       |
| GO:0051716                                                | cellular response to stimulus                     | 3.48E-06       |
| GO:1901990                                                | regulation of mitotic cell cycle phase transition | 3.57E-06       |
| GO:0006310                                                | DNA recombination                                 | 7.55E-06       |
| GO:0006323                                                | DNA packaging                                     | 8.43E-06       |

|            |                                                                   |          |
|------------|-------------------------------------------------------------------|----------|
| GO:0000731 | DNA synthesis involved in DNA repair                              | 9.75E-06 |
| GO:0006302 | double-strand break repair                                        | 1.04E-05 |
| GO:0010948 | negative regulation of cell cycle process                         | 1.16E-05 |
| GO:0071897 | DNA biosynthetic process                                          | 1.21E-05 |
| GO:1901991 | negative regulation of mitotic cell cycle phase transition        | 1.31E-05 |
| GO:0042276 | error-prone translesion synthesis                                 | 1.31E-05 |
| GO:0000726 | non-recombinational repair                                        | 1.33E-05 |
| GO:0006303 | double-strand break repair via nonhomologous end joining          | 1.33E-05 |
| GO:0007018 | microtubule-based movement                                        | 1.87E-05 |
| GO:0019985 | translesion synthesis                                             | 2.34E-05 |
| GO:0051383 | kinetochore organization                                          | 2.41E-05 |
| GO:0009987 | cellular process                                                  | 2.46E-05 |
| GO:1901988 | negative regulation of cell cycle phase transition                | 2.82E-05 |
| GO:0006270 | DNA replication initiation                                        | 3.49E-05 |
| GO:0045132 | meiotic chromosome segregation                                    | 3.66E-05 |
| GO:0007076 | mitotic chromosome condensation                                   | 3.66E-05 |
| GO:0007088 | regulation of mitotic nuclear division                            | 4.28E-05 |
| GO:0006297 | nucleotide-excision repair, DNA gap filling                       | 4.41E-05 |
| GO:0007093 | mitotic cell cycle checkpoint                                     | 4.73E-05 |
| GO:0009157 | deoxyribonucleoside monophosphate biosynthetic process            | 4.92E-05 |
| GO:0022616 | DNA strand elongation                                             | 5.74E-05 |
| GO:0044260 | cellular macromolecule metabolic process                          | 6.03E-05 |
| GO:0071103 | DNA conformation change                                           | 6.45E-05 |
| GO:0000075 | cell cycle checkpoint                                             | 6.96E-05 |
| GO:0000723 | telomere maintenance                                              | 7.24E-05 |
| GO:2000134 | negative regulation of G1/S transition of mitotic cell cycle      | 8.01E-05 |
| GO:0000226 | microtubule cytoskeleton organization                             | 9.85E-05 |
| GO:0009177 | pyrimidine deoxyribonucleoside monophosphate biosynthetic process | 1.02E-04 |
| GO:1902806 | regulation of cell cycle G1/S phase transition                    | 1.18E-04 |
| GO:1902807 | negative regulation of cell cycle G1/S phase transition           | 1.19E-04 |
| GO:0051983 | regulation of chromosome segregation                              | 1.27E-04 |
| GO:0044237 | cellular metabolic process                                        | 1.37E-04 |
| GO:0009219 | pyrimidine deoxyribonucleotide metabolic process                  | 1.42E-04 |
| GO:0000281 | mitotic cytokinesis                                               | 1.45E-04 |
| GO:0098840 | protein transport along microtubule                               | 1.45E-04 |
| GO:0042073 | intracellular transport                                           | 1.45E-04 |
| GO:0009059 | macromolecule biosynthetic process                                | 1.76E-04 |
| GO:0009394 | 2'-deoxyribonucleotide metabolic process                          | 1.78E-04 |
| GO:0006301 | postreplication repair                                            | 1.81E-04 |
| GO:2000045 | regulation of G1/S transition of mitotic cell cycle               | 1.83E-04 |
| GO:0006271 | DNA strand elongation involved in DNA replication                 | 1.88E-04 |
| GO:0051382 | kinetochore assembly                                              | 2.16E-04 |
| GO:0009162 | deoxyribonucleoside monophosphate metabolic process               | 2.16E-04 |
| GO:0045005 | DNA-dependent DNA replication maintenance of fidelity             | 2.17E-04 |
| GO:0007049 | cell cycle                                                        | 2.38E-04 |
| GO:0045787 | positive regulation of cell cycle                                 | 2.38E-04 |
| GO:0032200 | telomere organization                                             | 2.45E-04 |
| GO:0010032 | meiotic chromosome condensation                                   | 2.50E-04 |

|                                                             |                                                                               |                |
|-------------------------------------------------------------|-------------------------------------------------------------------------------|----------------|
| GO:0007386                                                  | compartment pattern specification                                             | 2.50E-04       |
| GO:0009176                                                  | pyrimidine deoxyribonucleoside monophosphate metabolic process                | 2.50E-04       |
| GO:0051310                                                  | metaphase plate congression                                                   | 2.52E-04       |
| GO:0044249                                                  | cellular biosynthetic process                                                 | 2.53E-04       |
| GO:0051783                                                  | regulation of nuclear division                                                | 2.55E-04       |
| GO:0019692                                                  | deoxyribose phosphate metabolic process                                       | 2.63E-04       |
| GO:0044238                                                  | primary metabolic process                                                     | 2.90E-04       |
| GO:0006298                                                  | mismatch repair                                                               | 3.16E-04       |
| GO:0009262                                                  | deoxyribonucleotide metabolic process                                         | 3.76E-04       |
| GO:0070925                                                  | organelle assembly                                                            | 3.85E-04       |
| GO:0006220                                                  | pyrimidine nucleotide metabolic process                                       | 3.87E-04       |
| GO:0061640                                                  | cytoskeleton-dependent cytokinesis                                            | 4.45E-04       |
| GO:0070986                                                  | left/right axis specification                                                 | 4.47E-04       |
| GO:0000086                                                  | G2/M transition of mitotic cell cycle                                         | 4.72E-04       |
| GO:1900264                                                  | positive regulation of DNA-directed DNA polymerase activity                   | 4.89E-04       |
| GO:1900262                                                  | regulation of DNA-directed DNA polymerase activity                            | 4.89E-04       |
| GO:0006545                                                  | glycine biosynthetic process                                                  | 4.89E-04       |
| GO:0045143                                                  | homologous chromosome segregation                                             | 4.89E-04       |
| GO:1901576                                                  | organic substance biosynthetic process                                        | 4.92E-04       |
| GO:0044839                                                  | cell cycle G2/M phase transition                                              | 5.42E-04       |
| GO:0009058                                                  | biosynthetic process                                                          | 6.02E-04       |
| GO:0042769                                                  | DNA damage response, detection of DNA damage                                  | 6.13E-04       |
| GO:0071704                                                  | organic substance metabolic process                                           | 6.17E-04       |
| GO:0000070                                                  | mitotic sister chromatid segregation                                          | 7.41E-04       |
| GO:0000083                                                  | regulation of transcription involved in G1/S transition of mitotic cell cycle | 7.41E-04       |
| GO:0033047                                                  | regulation of mitotic sister chromatid segregation                            | 8.30E-04       |
| GO:0009204                                                  | deoxyribonucleoside triphosphate catabolic process                            | 8.37E-04       |
| GO:0009221                                                  | pyrimidine deoxyribonucleotide biosynthetic process                           | 8.37E-04       |
| GO:0035735                                                  | intraciliary transport involved in cilium assembly                            | 8.37E-04       |
| GO:0006550                                                  | isoleucine catabolic process                                                  | 8.83E-04       |
| GO:0045004                                                  | DNA replication proofreading                                                  | 8.83E-04       |
| GO:0019264                                                  | glycine biosynthetic process from serine                                      | 8.83E-04       |
| GO:1901874                                                  | negative regulation of post-translational protein modification                | 8.83E-04       |
| GO:1901873                                                  | regulation of post-translational protein modification                         | 8.83E-04       |
| GO:0046356                                                  | acetyl-CoA catabolic process                                                  | 8.83E-04       |
| GO:0031102                                                  | neuron projection regeneration                                                | 8.95E-04       |
| GO:0018130                                                  | heterocycle biosynthetic process                                              | 9.15E-04       |
| GO:0051052                                                  | regulation of DNA metabolic process                                           | 9.71E-04       |
| <b>GO Categories of Downregulated Genes in HPV16 Cervix</b> |                                                                               |                |
| <b>GO Term</b>                                              | <b>Description</b>                                                            | <b>P-value</b> |
| GO:0008544                                                  | epidermis development                                                         | 4.38E-09       |
| GO:0022617                                                  | extracellular matrix disassembly                                              | 4.44E-07       |
| GO:0033561                                                  | regulation of water loss via skin                                             | 1.71E-06       |
| GO:0030148                                                  | sphingolipid biosynthetic process                                             | 2.68E-06       |
| GO:0030216                                                  | keratinocyte differentiation                                                  | 3.99E-06       |
| GO:0009913                                                  | epidermal cell differentiation                                                | 5.16E-06       |
| GO:0018149                                                  | peptide cross-linking                                                         | 7.85E-06       |

|            |                                                                          |          |
|------------|--------------------------------------------------------------------------|----------|
| GO:0048584 | positive regulation of response to stimulus                              | 8.29E-06 |
| GO:0030198 | extracellular matrix organization                                        | 1.00E-05 |
| GO:0043062 | extracellular structure organization                                     | 1.06E-05 |
| GO:0046467 | membrane lipid biosynthetic process                                      | 1.13E-05 |
| GO:0061436 | establishment of skin barrier                                            | 1.35E-05 |
| GO:0043123 | positive regulation of I-kappaB kinase/NF-kappaB signaling               | 1.44E-05 |
| GO:0031424 | keratinization                                                           | 1.44E-05 |
| GO:0043122 | regulation of I-kappaB kinase/NF-kappaB signaling                        | 1.62E-05 |
| GO:0046330 | positive regulation of JNK cascade                                       | 1.89E-05 |
| GO:0090361 | regulation of platelet-derived growth factor production                  | 3.20E-05 |
| GO:0000041 | transition metal ion transport                                           | 3.47E-05 |
| GO:0023056 | positive regulation of signaling                                         | 3.65E-05 |
| GO:0009967 | positive regulation of signal transduction                               | 3.85E-05 |
| GO:0010574 | regulation of vascular endothelial growth factor production              | 4.28E-05 |
| GO:0048583 | regulation of response to stimulus                                       | 4.43E-05 |
| GO:0010647 | positive regulation of cell communication                                | 5.35E-05 |
| GO:0006665 | sphingolipid metabolic process                                           | 6.02E-05 |
| GO:0090026 | positive regulation of monocyte chemotaxis                               | 7.35E-05 |
| GO:0023051 | regulation of signaling                                                  | 8.30E-05 |
| GO:0040017 | positive regulation of locomotion                                        | 9.74E-05 |
| GO:1902533 | positive regulation of intracellular signal transduction                 | 9.81E-05 |
| GO:0010646 | regulation of cell communication                                         | 9.89E-05 |
| GO:0030335 | positive regulation of cell migration                                    | 1.07E-04 |
| GO:0032874 | positive regulation of stress-activated MAPK cascade                     | 1.11E-04 |
| GO:0046520 | sphingoid biosynthetic process                                           | 1.12E-04 |
| GO:0001676 | long-chain fatty acid metabolic process                                  | 1.18E-04 |
| GO:0070304 | positive regulation of stress-activated protein kinase signaling cascade | 1.20E-04 |
| GO:0080134 | regulation of response to stress                                         | 1.45E-04 |
| GO:0033559 | unsaturated fatty acid metabolic process                                 | 1.51E-04 |
| GO:0048871 | multicellular organismal homeostasis                                     | 1.65E-04 |
| GO:0010575 | positive regulation of vascular endothelial growth factor production     | 1.68E-04 |
| GO:0032101 | regulation of response to external stimulus                              | 1.77E-04 |
| GO:0007155 | cell adhesion                                                            | 1.85E-04 |
| GO:2000147 | positive regulation of cell motility                                     | 1.92E-04 |
| GO:0022610 | biological adhesion                                                      | 2.02E-04 |
| GO:0006643 | membrane lipid metabolic process                                         | 2.23E-04 |
| GO:0030855 | epithelial cell differentiation                                          | 2.31E-04 |
| GO:0034330 | cell junction organization                                               | 2.69E-04 |
| GO:0051272 | positive regulation of cellular component movement                       | 2.85E-04 |
| GO:0009966 | regulation of signal transduction                                        | 3.10E-04 |
| GO:0071677 | positive regulation of mononuclear cell migration                        | 3.33E-04 |
| GO:0090025 | regulation of monocyte chemotaxis                                        | 3.33E-04 |
| GO:0050891 | multicellular organismal water homeostasis                               | 3.68E-04 |
| GO:0009888 | tissue development                                                       | 3.94E-04 |
| GO:0008219 | cell death                                                               | 4.52E-04 |
| GO:0001817 | regulation of cytokine production                                        | 4.76E-04 |
| GO:0016241 | regulation of macroautophagy                                             | 5.52E-04 |

|            |                                                                                                 |          |
|------------|-------------------------------------------------------------------------------------------------|----------|
| GO:0046328 | regulation of JNK cascade                                                                       | 5.64E-04 |
| GO:0046519 | sphingoid metabolic process                                                                     | 5.75E-04 |
| GO:0032596 | protein transport into membrane raft                                                            | 5.95E-04 |
| GO:0039532 | negative regulation of viral-induced cytoplasmic pattern recognition receptor signaling pathway | 5.95E-04 |
| GO:0038034 | signal transduction in absence of ligand                                                        | 6.33E-04 |
| GO:0097192 | extrinsic apoptotic signaling pathway in absence of ligand                                      | 6.33E-04 |
| GO:0045861 | negative regulation of proteolysis                                                              | 6.70E-04 |
| GO:0019369 | arachidonic acid metabolic process                                                              | 7.51E-04 |
| GO:0031347 | regulation of defense response                                                                  | 8.02E-04 |
| GO:0040012 | regulation of locomotion                                                                        | 8.99E-04 |
| GO:0045087 | innate immune response                                                                          | 9.08E-04 |
| GO:0030574 | collagen catabolic process                                                                      | 9.17E-04 |

### Supplementary Table S1b

| GO Categories of Upregulated Genes in HPV16 Foreskin |                                               |          |
|------------------------------------------------------|-----------------------------------------------|----------|
| GO Term                                              | Description                                   | P-value  |
| GO:1903047                                           | mitotic cell cycle process                    | 9.51E-44 |
| GO:0022402                                           | cell cycle process                            | 1.19E-41 |
| GO:0051276                                           | chromosome organization                       | 4.68E-31 |
| GO:0051301                                           | cell division                                 | 4.14E-26 |
| GO:0044770                                           | cell cycle phase transition                   | 9.16E-25 |
| GO:0044772                                           | mitotic cell cycle phase transition           | 2.37E-24 |
| GO:0006259                                           | DNA metabolic process                         | 2.40E-24 |
| GO:0006260                                           | DNA replication                               | 2.94E-23 |
| GO:0044843                                           | cell cycle G1/S phase transition              | 3.50E-20 |
| GO:0000082                                           | G1/S transition of mitotic cell cycle         | 3.17E-19 |
| GO:0000280                                           | nuclear division                              | 3.03E-18 |
| GO:0007067                                           | mitotic nuclear division                      | 1.25E-17 |
| GO:0048285                                           | organelle fission                             | 1.55E-17 |
| GO:0051726                                           | regulation of cell cycle                      | 6.75E-17 |
| GO:0006996                                           | organelle organization                        | 1.01E-16 |
| GO:0006270                                           | DNA replication initiation                    | 7.68E-16 |
| GO:0006312                                           | mitotic recombination                         | 6.63E-15 |
| GO:0006281                                           | DNA repair                                    | 8.35E-14 |
| GO:0006974                                           | cellular response to DNA damage stimulus      | 1.08E-13 |
| GO:0007062                                           | sister chromatid cohesion                     | 6.66E-13 |
| GO:0000722                                           | telomere maintenance via recombination        | 1.38E-12 |
| GO:0010564                                           | regulation of cell cycle process              | 1.75E-12 |
| GO:1903046                                           | meiotic cell cycle process                    | 5.77E-12 |
| GO:0007059                                           | chromosome segregation                        | 8.08E-12 |
| GO:0006310                                           | DNA recombination                             | 6.76E-11 |
| GO:0016043                                           | cellular component organization               | 7.98E-11 |
| GO:0051983                                           | regulation of chromosome segregation          | 9.21E-11 |
| GO:0007017                                           | microtubule-based process                     | 1.33E-10 |
| GO:0007346                                           | regulation of mitotic cell cycle              | 1.59E-10 |
| GO:0071840                                           | cellular component organization or biogenesis | 1.91E-10 |

|            |                                                           |          |
|------------|-----------------------------------------------------------|----------|
| GO:0007051 | spindle organization                                      | 2.18E-10 |
| GO:0007088 | regulation of mitotic nuclear division                    | 3.82E-10 |
| GO:0098813 | nuclear chromosome segregation                            | 9.87E-10 |
| GO:0051783 | regulation of nuclear division                            | 1.19E-09 |
| GO:0071897 | DNA biosynthetic process                                  | 1.31E-09 |
| GO:0000226 | microtubule cytoskeleton organization                     | 2.03E-09 |
| GO:0071103 | DNA conformation change                                   | 3.68E-09 |
| GO:0006735 | NADH regeneration                                         | 3.71E-09 |
| GO:0061718 | glucose catabolic process to pyruvate                     | 3.71E-09 |
| GO:0061621 | canonical glycolysis                                      | 3.71E-09 |
| GO:0061620 | glycolytic process through glucose-6-phosphate            | 5.72E-09 |
| GO:0061615 | glycolytic process through fructose-6-phosphate           | 5.72E-09 |
| GO:0000731 | DNA synthesis involved in DNA repair                      | 9.00E-09 |
| GO:0042769 | DNA damage response, detection of DNA damage              | 1.02E-08 |
| GO:0006007 | glucose catabolic process                                 | 1.28E-08 |
| GO:0006096 | glycolytic process                                        | 1.41E-08 |
| GO:0006090 | pyruvate metabolic process                                | 1.83E-08 |
| GO:0006297 | nucleotide-excision repair, DNA gap filling               | 1.91E-08 |
| GO:0006757 | ATP generation from ADP                                   | 1.92E-08 |
| GO:0036297 | interstrand cross-link repair                             | 2.07E-08 |
| GO:0070192 | chromosome organization involved in meiotic cell cycle    | 2.34E-08 |
| GO:0007052 | mitotic spindle organization                              | 2.34E-08 |
| GO:0045786 | negative regulation of cell cycle                         | 2.84E-08 |
| GO:1902850 | microtubule cytoskeleton organization involved in mitosis | 2.93E-08 |
| GO:0033554 | cellular response to stress                               | 3.63E-08 |
| GO:0065004 | protein-DNA complex assembly                              | 4.58E-08 |
| GO:0051383 | kinetochore organization                                  | 5.03E-08 |
| GO:0019985 | translesion synthesis                                     | 6.08E-08 |
| GO:0006734 | NADH metabolic process                                    | 7.25E-08 |
| GO:0046031 | ADP metabolic process                                     | 7.93E-08 |
| GO:0044699 | single-organism process                                   | 7.97E-08 |
| GO:0033045 | regulation of sister chromatid segregation                | 8.38E-08 |
| GO:0006336 | DNA replication-independent nucleosome assembly           | 8.88E-08 |
| GO:0007076 | mitotic chromosome condensation                           | 9.77E-08 |
| GO:0042276 | error-prone translesion synthesis                         | 9.87E-08 |
| GO:0006094 | gluconeogenesis                                           | 1.03E-07 |
| GO:0019362 | pyridine nucleotide metabolic process                     | 1.04E-07 |
| GO:0046496 | nicotinamide nucleotide metabolic process                 | 1.04E-07 |
| GO:0034724 | DNA replication-independent nucleosome organization       | 1.11E-07 |
| GO:0006301 | postreplication repair                                    | 1.11E-07 |
| GO:0000723 | telomere maintenance                                      | 1.38E-07 |
| GO:0051052 | regulation of DNA metabolic process                       | 1.48E-07 |
| GO:0051716 | cellular response to stimulus                             | 1.50E-07 |
| GO:0006266 | DNA ligation                                              | 1.55E-07 |
| GO:0000086 | G2/M transition of mitotic cell cycle                     | 1.70E-07 |
| GO:0030261 | chromosome condensation                                   | 1.97E-07 |
| GO:0044763 | single-organism cellular process                          | 2.11E-07 |
| GO:0019319 | hexose biosynthetic process                               | 2.14E-07 |
| GO:0044839 | cell cycle G2/M phase transition                          | 2.15E-07 |

|            |                                                                               |          |
|------------|-------------------------------------------------------------------------------|----------|
| GO:0072524 | pyridine-containing compound metabolic process                                | 2.40E-07 |
| GO:0006139 | nucleobase-containing compound metabolic process                              | 3.28E-07 |
| GO:0019320 | hexose catabolic process                                                      | 3.37E-07 |
| GO:0034502 | protein localization to chromosome                                            | 4.20E-07 |
| GO:0071824 | protein-DNA complex subunit organization                                      | 4.76E-07 |
| GO:0000075 | cell cycle checkpoint                                                         | 5.31E-07 |
| GO:0046034 | ATP metabolic process                                                         | 5.93E-07 |
| GO:0034080 | CENP-A containing nucleosome assembly                                         | 6.45E-07 |
| GO:0006302 | double-strand break repair                                                    | 6.63E-07 |
| GO:0000819 | sister chromatid segregation                                                  | 7.35E-07 |
| GO:0000083 | regulation of transcription involved in G1/S transition of mitotic cell cycle | 7.35E-07 |
| GO:0032200 | telomere organization                                                         | 7.57E-07 |
| GO:0034641 | cellular nitrogen compound metabolic process                                  | 7.70E-07 |
| GO:0043486 | histone exchange                                                              | 7.85E-07 |
| GO:0046364 | monosaccharide biosynthetic process                                           | 7.85E-07 |
| GO:0019674 | NAD metabolic process                                                         | 7.91E-07 |
| GO:0006733 | oxidoreduction coenzyme metabolic process                                     | 8.54E-07 |
| GO:0009144 | purine nucleoside triphosphate metabolic process                              | 9.00E-07 |
| GO:0006165 | nucleoside diphosphate phosphorylation                                        | 9.57E-07 |
| GO:0006006 | glucose metabolic process                                                     | 9.62E-07 |
| GO:0060249 | anatomical structure homeostasis                                              | 1.02E-06 |
| GO:0090068 | positive regulation of cell cycle process                                     | 1.03E-06 |
| GO:0006333 | chromatin assembly or disassembly                                             | 1.05E-06 |
| GO:0070987 | error-free translesion synthesis                                              | 1.25E-06 |
| GO:0006807 | nitrogen compound metabolic process                                           | 1.27E-06 |
| GO:1901796 | regulation of signal transduction by p53 class mediator                       | 1.33E-06 |
| GO:0006323 | DNA packaging                                                                 | 1.52E-06 |
| GO:0031055 | chromatin remodeling at centromere                                            | 1.59E-06 |
| GO:0009141 | nucleoside triphosphate metabolic process                                     | 1.60E-06 |
| GO:0033044 | regulation of chromosome organization                                         | 1.82E-06 |
| GO:0051984 | positive regulation of chromosome segregation                                 | 1.86E-06 |
| GO:0006296 | nucleotide-excision repair, DNA incision, 5'-to lesion                        | 1.95E-06 |
| GO:0046605 | regulation of centrosome cycle                                                | 1.96E-06 |
| GO:0009205 | purine ribonucleoside triphosphate metabolic process                          | 2.00E-06 |
| GO:0046483 | heterocycle metabolic process                                                 | 2.22E-06 |
| GO:0046365 | monosaccharide catabolic process                                              | 2.42E-06 |
| GO:0051225 | spindle assembly                                                              | 2.42E-06 |
| GO:0046939 | nucleotide phosphorylation                                                    | 2.42E-06 |
| GO:0009179 | purine ribonucleoside diphosphate metabolic process                           | 2.42E-06 |
| GO:0009135 | purine nucleoside diphosphate metabolic process                               | 2.42E-06 |
| GO:0009987 | cellular process                                                              | 2.52E-06 |
| GO:0000281 | mitotic cytokinesis                                                           | 2.60E-06 |
| GO:0033683 | nucleotide-excision repair, DNA incision                                      | 3.13E-06 |
| GO:0006338 | chromatin remodeling                                                          | 3.19E-06 |
| GO:0009185 | ribonucleoside diphosphate metabolic process                                  | 3.41E-06 |
| GO:0009199 | ribonucleoside triphosphate metabolic process                                 | 3.63E-06 |
| GO:0000070 | mitotic sister chromatid segregation                                          | 3.88E-06 |
| GO:0051297 | centrosome organization                                                       | 3.94E-06 |

|            |                                                         |          |
|------------|---------------------------------------------------------|----------|
| GO:0044238 | primary metabolic process                               | 5.26E-06 |
| GO:0006950 | response to stress                                      | 5.35E-06 |
| GO:0009123 | nucleoside monophosphate metabolic process              | 5.39E-06 |
| GO:0006298 | mismatch repair                                         | 5.85E-06 |
| GO:0006725 | cellular aromatic compound metabolic process            | 6.19E-06 |
| GO:1901360 | organic cyclic compound metabolic process               | 7.89E-06 |
| GO:0045787 | positive regulation of cell cycle                       | 8.56E-06 |
| GO:0006325 | chromatin organization                                  | 9.57E-06 |
| GO:0001556 | oocyte maturation                                       | 9.94E-06 |
| GO:0009628 | response to abiotic stimulus                            | 1.03E-05 |
| GO:0031023 | microtubule organizing center organization              | 1.04E-05 |
| GO:0009167 | purine ribonucleoside monophosphate metabolic process   | 1.08E-05 |
| GO:0051054 | positive regulation of DNA metabolic process            | 1.10E-05 |
| GO:0045840 | positive regulation of mitotic nuclear division         | 1.10E-05 |
| GO:0009126 | purine nucleoside monophosphate metabolic process       | 1.18E-05 |
| GO:0032787 | monocarboxylic acid metabolic process                   | 1.18E-05 |
| GO:0051382 | kinetochore assembly                                    | 1.34E-05 |
| GO:0008608 | attachment of spindle microtubules to kinetochore       | 1.45E-05 |
| GO:0061640 | cytoskeleton-dependent cytokinesis                      | 1.50E-05 |
| GO:0010032 | meiotic chromosome condensation                         | 1.52E-05 |
| GO:0044282 | small molecule catabolic process                        | 1.58E-05 |
| GO:0044237 | cellular metabolic process                              | 2.13E-05 |
| GO:0006271 | DNA strand elongation involved in DNA replication       | 2.23E-05 |
| GO:0043044 | ATP-dependent chromatin remodeling                      | 2.33E-05 |
| GO:0009116 | nucleoside metabolic process                            | 2.43E-05 |
| GO:0016051 | carbohydrate biosynthetic process                       | 2.65E-05 |
| GO:0007063 | regulation of sister chromatid cohesion                 | 2.87E-05 |
| GO:0009161 | ribonucleoside monophosphate metabolic process          | 2.88E-05 |
| GO:0033043 | regulation of organelle organization                    | 3.03E-05 |
| GO:0033047 | regulation of mitotic sister chromatid segregation      | 3.18E-05 |
| GO:0045930 | negative regulation of mitotic cell cycle               | 3.38E-05 |
| GO:0042278 | purine nucleoside metabolic process                     | 3.51E-05 |
| GO:0072698 | protein localization to microtubule cytoskeleton        | 3.70E-05 |
| GO:0006334 | nucleosome assembly                                     | 3.92E-05 |
| GO:0022414 | reproductive process                                    | 4.07E-05 |
| GO:0019318 | hexose metabolic process                                | 4.14E-05 |
| GO:0090304 | nucleic acid metabolic process                          | 4.22E-05 |
| GO:0045931 | positive regulation of mitotic cell cycle               | 4.23E-05 |
| GO:0071704 | organic substance metabolic process                     | 4.37E-05 |
| GO:0009058 | biosynthetic process                                    | 4.58E-05 |
| GO:0009132 | nucleoside diphosphate metabolic process                | 4.92E-05 |
| GO:0071459 | protein localization to chromosome, centromeric region  | 5.35E-05 |
| GO:1901576 | organic substance biosynthetic process                  | 5.80E-05 |
| GO:0051310 | metaphase plate congression                             | 5.91E-05 |
| GO:0051785 | positive regulation of nuclear division                 | 5.93E-05 |
| GO:0000724 | double-strand break repair via homologous recombination | 6.20E-05 |
| GO:0006268 | DNA unwinding involved in DNA replication               | 6.72E-05 |
| GO:0000725 | recombinational repair                                  | 6.94E-05 |
| GO:0016052 | carbohydrate catabolic process                          | 7.06E-05 |



|            |                                                                 |          |
|------------|-----------------------------------------------------------------|----------|
| GO:0044380 | protein localization to cytoskeleton                            | 7.14E-05 |
| GO:0008152 | metabolic process                                               | 7.67E-05 |
| GO:1901990 | regulation of mitotic cell cycle phase transition               | 7.75E-05 |
| GO:0032392 | DNA geometric change                                            | 7.76E-05 |
| GO:0007093 | mitotic cell cycle checkpoint                                   | 7.76E-05 |
| GO:0045132 | meiotic chromosome segregation                                  | 7.82E-05 |
| GO:0051303 | establishment of chromosome localization                        | 7.93E-05 |
| GO:1901657 | glycosyl compound metabolic process                             | 8.59E-05 |
| GO:0007080 | mitotic metaphase plate congression                             | 8.74E-05 |
| GO:0046128 | purine ribonucleoside metabolic process                         | 9.09E-05 |
| GO:0055086 | nucleobase-containing small molecule metabolic process          | 9.42E-05 |
| GO:0044260 | cellular macromolecule metabolic process                        | 1.10E-04 |
| GO:0009117 | nucleotide metabolic process                                    | 1.12E-04 |
| GO:0045876 | positive regulation of sister chromatid cohesion                | 1.18E-04 |
| GO:0051315 | attachment of mitotic spindle microtubules to kinetochore       | 1.18E-04 |
| GO:0032508 | DNA duplex unwinding                                            | 1.25E-04 |
| GO:0019752 | carboxylic acid metabolic process                               | 1.30E-04 |
| GO:0044724 | single-organism carbohydrate catabolic process                  | 1.42E-04 |
| GO:0006753 | nucleoside phosphate metabolic process                          | 1.44E-04 |
| GO:0007131 | reciprocal meiotic recombination                                | 1.44E-04 |
| GO:0035825 | reciprocal DNA recombination                                    | 1.44E-04 |
| GO:0022616 | DNA strand elongation                                           | 1.53E-04 |
| GO:0007141 | male meiosis I                                                  | 1.53E-04 |
| GO:0050000 | chromosome localization                                         | 1.55E-04 |
| GO:0006091 | generation of precursor metabolites and energy                  | 1.60E-04 |
| GO:0009059 | macromolecule biosynthetic process                              | 1.61E-04 |
| GO:0070507 | regulation of microtubule cytoskeleton organization             | 1.83E-04 |
| GO:0009411 | response to UV                                                  | 1.83E-04 |
| GO:0010638 | positive regulation of organelle organization                   | 1.95E-04 |
| GO:1901987 | regulation of cell cycle phase transition                       | 2.07E-04 |
| GO:0034645 | cellular macromolecule biosynthetic process                     | 2.46E-04 |
| GO:0055114 | oxidation-reduction process                                     | 2.60E-04 |
| GO:0006890 | retrograde vesicle-mediated transport, Golgi to ER              | 2.67E-04 |
| GO:0007049 | cell cycle                                                      | 2.75E-04 |
| GO:0007219 | Notch signaling pathway                                         | 2.85E-04 |
| GO:0032886 | regulation of microtubule-based process                         | 2.89E-04 |
| GO:0044249 | cellular biosynthetic process                                   | 2.93E-04 |
| GO:0051988 | regulation of attachment of spindle microtubules to kinetochore | 2.93E-04 |
| GO:0034728 | nucleosome organization                                         | 2.95E-04 |
| GO:0000727 | double-strand break repair via break-induced replication        | 3.17E-04 |
| GO:0007386 | compartment pattern specification                               | 3.17E-04 |
| GO:0043436 | oxoacid metabolic process                                       | 3.34E-04 |
| GO:0030071 | regulation of mitotic metaphase/anaphase transition             | 3.51E-04 |
| GO:0090329 | regulation of DNA-dependent DNA replication                     | 3.51E-04 |
| GO:0044702 | single organism reproductive process                            | 3.73E-04 |
| GO:2001252 | positive regulation of chromosome organization                  | 3.81E-04 |
| GO:0033365 | protein localization to organelle                               | 3.90E-04 |
| GO:0034599 | cellular response to oxidative stress                           | 4.07E-04 |
| GO:1902099 | regulation of metaphase/anaphase transition of cell cycle       | 4.08E-04 |

|                                                               |                                                                         |                |
|---------------------------------------------------------------|-------------------------------------------------------------------------|----------------|
| GO:2000781                                                    | positive regulation of double-strand break repair                       | 4.29E-04       |
| GO:0009119                                                    | ribonucleoside metabolic process                                        | 4.49E-04       |
| GO:2000779                                                    | regulation of double-strand break repair                                | 4.71E-04       |
| GO:0010965                                                    | regulation of mitotic sister chromatid separation                       | 4.71E-04       |
| GO:0007126                                                    | meiotic nuclear division                                                | 4.89E-04       |
| GO:0006082                                                    | organic acid metabolic process                                          | 4.94E-04       |
| GO:0010948                                                    | negative regulation of cell cycle process                               | 5.21E-04       |
| GO:0045935                                                    | positive regulation of nucleobase-containing compound metabolic process | 5.28E-04       |
| GO:0006283                                                    | transcription-coupled nucleotide-excision repair                        | 5.42E-04       |
| GO:1905818                                                    | regulation of chromosome separation                                     | 5.43E-04       |
| GO:0007127                                                    | meiosis I                                                               | 5.69E-04       |
| GO:0005996                                                    | monosaccharide metabolic process                                        | 5.93E-04       |
| GO:0000910                                                    | cytokinesis                                                             | 6.00E-04       |
| GO:1900264                                                    | positive regulation of DNA-directed DNA polymerase activity             | 6.18E-04       |
| GO:1900262                                                    | regulation of DNA-directed DNA polymerase activity                      | 6.18E-04       |
| GO:0051299                                                    | centrosome separation                                                   | 6.18E-04       |
| GO:0007010                                                    | cytoskeleton organization                                               | 6.41E-04       |
| GO:0043170                                                    | macromolecule metabolic process                                         | 6.54E-04       |
| GO:0070925                                                    | organelle assembly                                                      | 7.04E-04       |
| GO:0016572                                                    | histone phosphorylation                                                 | 7.08E-04       |
| GO:0006163                                                    | purine nucleotide metabolic process                                     | 7.48E-04       |
| GO:0044283                                                    | small molecule biosynthetic process                                     | 7.56E-04       |
| GO:0000278                                                    | mitotic cell cycle                                                      | 7.96E-04       |
| GO:0034622                                                    | cellular macromolecular complex assembly                                | 8.12E-04       |
| GO:0010824                                                    | regulation of centrosome duplication                                    | 9.29E-04       |
| GO:0009150                                                    | purine ribonucleotide metabolic process                                 | 9.58E-04       |
| GO:0097711                                                    | ciliary basal body docking                                              | 9.62E-04       |
| <b>GO Categories of Downregulated Genes in HPV16 Foreskin</b> |                                                                         |                |
| <b>GO Term</b>                                                | <b>Description</b>                                                      | <b>P-value</b> |
| GO:0060337                                                    | type I interferon signaling pathway                                     | 1.85E-23       |
| GO:0051707                                                    | response to other organism                                              | 7.00E-17       |
| GO:0043207                                                    | response to external biotic stimulus                                    | 7.77E-17       |
| GO:0098542                                                    | defense response to other organism                                      | 1.73E-16       |
| GO:0002376                                                    | immune system process                                                   | 2.16E-16       |
| GO:0009607                                                    | response to biotic stimulus                                             | 2.55E-16       |
| GO:0051607                                                    | defense response to virus                                               | 3.73E-15       |
| GO:0009615                                                    | response to virus                                                       | 6.54E-15       |
| GO:0042221                                                    | response to chemical                                                    | 5.57E-14       |
| GO:0006952                                                    | defense response                                                        | 3.43E-13       |
| GO:0045071                                                    | negative regulation of viral genome replication                         | 3.91E-13       |
| GO:0009605                                                    | response to external stimulus                                           | 3.96E-13       |
| GO:0010033                                                    | response to organic substance                                           | 3.89E-12       |
| GO:0051704                                                    | multi-organism process                                                  | 5.18E-12       |
| GO:0044710                                                    | single-organism metabolic process                                       | 5.96E-12       |
| GO:0019221                                                    | cytokine-mediated signaling pathway                                     | 8.52E-12       |
| GO:0044699                                                    | single-organism process                                                 | 9.20E-12       |
| GO:0002252                                                    | immune effector process                                                 | 1.05E-11       |
| GO:1903901                                                    | negative regulation of viral life cycle                                 | 2.67E-11       |

|            |                                                                                                   |          |
|------------|---------------------------------------------------------------------------------------------------|----------|
| GO:0050896 | response to stimulus                                                                              | 3.60E-11 |
| GO:0060333 | interferon-gamma-mediated signaling pathway                                                       | 5.22E-11 |
| GO:0045069 | regulation of viral genome replication                                                            | 6.29E-11 |
| GO:0019752 | carboxylic acid metabolic process                                                                 | 3.06E-10 |
| GO:0048525 | negative regulation of viral process                                                              | 4.21E-10 |
| GO:0006955 | immune response                                                                                   | 5.59E-10 |
| GO:0043901 | negative regulation of multi-organism process                                                     | 9.00E-10 |
| GO:0016032 | viral process                                                                                     | 1.79E-09 |
| GO:0044403 | symbiosis, encompassing mutualism through parasitism                                              | 1.79E-09 |
| GO:0006082 | organic acid metabolic process                                                                    | 2.41E-09 |
| GO:0044764 | multi-organism cellular process                                                                   | 2.70E-09 |
| GO:0006950 | response to stress                                                                                | 2.83E-09 |
| GO:0044419 | interspecies interaction between organisms                                                        | 3.50E-09 |
| GO:0070268 | cornification                                                                                     | 3.65E-09 |
| GO:0043436 | oxoacid metabolic process                                                                         | 5.74E-09 |
| GO:0044763 | single-organism cellular process                                                                  | 8.67E-09 |
| GO:0044281 | small molecule metabolic process                                                                  | 9.69E-09 |
| GO:0034097 | response to cytokine                                                                              | 1.00E-08 |
| GO:0035455 | response to interferon-alpha                                                                      | 1.23E-08 |
| GO:0001817 | regulation of cytokine production                                                                 | 1.24E-08 |
| GO:0043903 | regulation of symbiosis, encompassing mutualism through parasitism                                | 1.27E-08 |
| GO:0050792 | regulation of viral process                                                                       | 1.95E-08 |
| GO:0016053 | organic acid biosynthetic process                                                                 | 2.14E-08 |
| GO:0046394 | carboxylic acid biosynthetic process                                                              | 2.14E-08 |
| GO:0008544 | epidermis development                                                                             | 2.43E-08 |
| GO:0043900 | regulation of multi-organism process                                                              | 8.13E-08 |
| GO:0034340 | response to type I interferon                                                                     | 1.32E-07 |
| GO:0008285 | negative regulation of cell proliferation                                                         | 1.47E-07 |
| GO:0044283 | small molecule biosynthetic process                                                               | 1.65E-07 |
| GO:0035456 | response to interferon-beta                                                                       | 1.72E-07 |
| GO:0044711 | single-organism biosynthetic process                                                              | 1.75E-07 |
| GO:1903900 | regulation of viral life cycle                                                                    | 1.99E-07 |
| GO:0006629 | lipid metabolic process                                                                           | 2.10E-07 |
| GO:0002480 | antigen processing and presentation of exogenous peptide antigen via MHC class I, TAP-independent | 3.83E-07 |
| GO:0001819 | positive regulation of cytokine production                                                        | 6.06E-07 |
| GO:0016042 | lipid catabolic process                                                                           | 7.37E-07 |
| GO:0032675 | regulation of interleukin-6 production                                                            | 8.44E-07 |
| GO:0042127 | regulation of cell proliferation                                                                  | 1.01E-06 |
| GO:0002474 | antigen processing and presentation of peptide antigen via MHC class I                            | 1.31E-06 |
| GO:1901564 | organonitrogen compound metabolic process                                                         | 1.49E-06 |
| GO:0002682 | regulation of immune system process                                                               | 1.56E-06 |
| GO:0032787 | monocarboxylic acid metabolic process                                                             | 1.77E-06 |
| GO:0012501 | programmed cell death                                                                             | 1.88E-06 |
| GO:0072330 | monocarboxylic acid biosynthetic process                                                          | 1.90E-06 |
| GO:0008219 | cell death                                                                                        | 1.95E-06 |
| GO:0031581 | hemidesmosome assembly                                                                            | 1.96E-06 |

|            |                                                                                                 |          |
|------------|-------------------------------------------------------------------------------------------------|----------|
| GO:0002479 | antigen processing and presentation of exogenous peptide antigen via MHC class I, TAP-dependent | 2.58E-06 |
| GO:0019730 | antimicrobial humoral response                                                                  | 2.58E-06 |
| GO:0009913 | epidermal cell differentiation                                                                  | 2.71E-06 |
| GO:0043651 | linoleic acid metabolic process                                                                 | 2.83E-06 |
| GO:0006631 | fatty acid metabolic process                                                                    | 3.59E-06 |
| GO:0042590 | antigen processing and presentation of exogenous peptide antigen via MHC class I                | 4.16E-06 |
| GO:0048523 | negative regulation of cellular process                                                         | 4.58E-06 |
| GO:0044712 | single-organism catabolic process                                                               | 4.69E-06 |
| GO:0009056 | catabolic process                                                                               | 5.32E-06 |
| GO:0014070 | response to organic cyclic compound                                                             | 6.21E-06 |
| GO:0048584 | positive regulation of response to stimulus                                                     | 6.66E-06 |
| GO:0030216 | keratinocyte differentiation                                                                    | 7.37E-06 |
| GO:0050776 | regulation of immune response                                                                   | 1.07E-05 |
| GO:0032755 | positive regulation of interleukin-6 production                                                 | 1.10E-05 |
| GO:0044255 | cellular lipid metabolic process                                                                | 1.11E-05 |
| GO:0007166 | cell surface receptor signaling pathway                                                         | 1.15E-05 |
| GO:0048583 | regulation of response to stimulus                                                              | 1.23E-05 |
| GO:0009395 | phospholipid catabolic process                                                                  | 1.28E-05 |
| GO:0051239 | regulation of multicellular organismal process                                                  | 1.31E-05 |
| GO:0002702 | positive regulation of production of molecular mediator of immune response                      | 1.80E-05 |
| GO:0031349 | positive regulation of defense response                                                         | 1.83E-05 |
| GO:0009968 | negative regulation of signal transduction                                                      | 1.83E-05 |
| GO:0006959 | humoral immune response                                                                         | 1.98E-05 |
| GO:0032479 | regulation of type I interferon production                                                      | 2.19E-05 |
| GO:0045087 | innate immune response                                                                          | 2.20E-05 |
| GO:0023057 | negative regulation of signaling                                                                | 2.31E-05 |
| GO:0042178 | xenobiotic catabolic process                                                                    | 2.60E-05 |
| GO:0050778 | positive regulation of immune response                                                          | 2.89E-05 |
| GO:0001676 | long-chain fatty acid metabolic process                                                         | 2.89E-05 |
| GO:0002684 | positive regulation of immune system process                                                    | 2.94E-05 |
| GO:0008150 | biological_process                                                                              | 3.01E-05 |
| GO:0002366 | leukocyte activation involved in immune response                                                | 3.08E-05 |
| GO:0002263 | cell activation involved in immune response                                                     | 3.35E-05 |
| GO:0010648 | negative regulation of cell communication                                                       | 3.61E-05 |
| GO:0006633 | fatty acid biosynthetic process                                                                 | 4.02E-05 |
| GO:0048585 | negative regulation of response to stimulus                                                     | 4.07E-05 |
| GO:0019885 | antigen processing and presentation of endogenous peptide antigen via MHC class I               | 4.17E-05 |
| GO:0008610 | lipid biosynthetic process                                                                      | 4.78E-05 |
| GO:0006693 | prostaglandin metabolic process                                                                 | 5.22E-05 |
| GO:0006692 | prostanoid metabolic process                                                                    | 5.22E-05 |
| GO:0048519 | negative regulation of biological process                                                       | 5.29E-05 |
| GO:0030855 | epithelial cell differentiation                                                                 | 5.59E-05 |
| GO:0018149 | peptide cross-linking                                                                           | 5.62E-05 |
| GO:0018916 | nitrobenzene metabolic process                                                                  | 7.17E-05 |
| GO:0070458 | cellular detoxification of nitrogen compound                                                    | 7.17E-05 |

|            |                                                                        |          |
|------------|------------------------------------------------------------------------|----------|
| GO:0046942 | carboxylic acid transport                                              | 7.49E-05 |
| GO:0050707 | regulation of cytokine secretion                                       | 7.93E-05 |
| GO:0032649 | regulation of interferon-gamma production                              | 8.59E-05 |
| GO:1901615 | organic hydroxy compound metabolic process                             | 8.63E-05 |
| GO:0045089 | positive regulation of innate immune response                          | 8.71E-05 |
| GO:0048518 | positive regulation of biological process                              | 8.77E-05 |
| GO:0002483 | antigen processing and presentation of endogenous peptide antigen      | 9.40E-05 |
| GO:0043122 | regulation of I-kappaB kinase/NF-kappaB signaling                      | 9.46E-05 |
| GO:0006869 | lipid transport                                                        | 1.05E-04 |
| GO:0044242 | cellular lipid catabolic process                                       | 1.13E-04 |
| GO:0055114 | oxidation-reduction process                                            | 1.14E-04 |
| GO:0050715 | positive regulation of cytokine secretion                              | 1.21E-04 |
| GO:0015849 | organic acid transport                                                 | 1.22E-04 |
| GO:0043123 | positive regulation of I-kappaB kinase/NF-kappaB signaling             | 1.29E-04 |
| GO:1901566 | organonitrogen compound biosynthetic process                           | 1.35E-04 |
| GO:0032481 | positive regulation of type I interferon production                    | 1.38E-04 |
| GO:0042742 | defense response to bacterium                                          | 1.43E-04 |
| GO:1905039 | carboxylic acid transmembrane transport                                | 1.68E-04 |
| GO:0031347 | regulation of defense response                                         | 1.79E-04 |
| GO:0030638 | polyketide metabolic process                                           | 1.82E-04 |
| GO:0044598 | doxorubicin metabolic process                                          | 1.82E-04 |
| GO:0044597 | daunorubicin metabolic process                                         | 1.82E-04 |
| GO:0045088 | regulation of innate immune response                                   | 1.82E-04 |
| GO:0097164 | ammonium ion metabolic process                                         | 1.87E-04 |
| GO:0051241 | negative regulation of multicellular organismal process                | 1.88E-04 |
| GO:0050830 | defense response to Gram-positive bacterium                            | 1.92E-04 |
| GO:0033559 | unsaturated fatty acid metabolic process                               | 2.26E-04 |
| GO:0048660 | regulation of smooth muscle cell proliferation                         | 2.26E-04 |
| GO:0070887 | cellular response to chemical stimulus                                 | 2.41E-04 |
| GO:0040012 | regulation of locomotion                                               | 2.50E-04 |
| GO:0022617 | extracellular matrix disassembly                                       | 2.59E-04 |
| GO:0034375 | high-density lipoprotein particle remodeling                           | 2.60E-04 |
| GO:0042119 | neutrophil activation                                                  | 2.63E-04 |
| GO:0097113 | AMPA glutamate receptor clustering                                     | 2.78E-04 |
| GO:0002741 | positive regulation of cytokine secretion involved in immune response  | 2.78E-04 |
| GO:0097688 | glutamate receptor clustering                                          | 2.78E-04 |
| GO:0043588 | skin development                                                       | 2.84E-04 |
| GO:0010574 | regulation of vascular endothelial growth factor production            | 2.84E-04 |
| GO:0002720 | positive regulation of cytokine production involved in immune response | 2.84E-04 |
| GO:0036230 | granulocyte activation                                                 | 2.85E-04 |
| GO:0051716 | cellular response to stimulus                                          | 2.87E-04 |
| GO:0009888 | tissue development                                                     | 2.91E-04 |
| GO:0048522 | positive regulation of cellular process                                | 2.91E-04 |
| GO:0033993 | response to lipid                                                      | 3.02E-04 |
| GO:0071223 | cellular response to lipoteichoic acid                                 | 3.16E-04 |
| GO:0030647 | aminoglycoside antibiotic metabolic process                            | 3.16E-04 |

|            |                                                                                     |          |
|------------|-------------------------------------------------------------------------------------|----------|
| GO:0070391 | response to lipoteichoic acid                                                       | 3.16E-04 |
| GO:0044707 | single-multicellular organism process                                               | 3.41E-04 |
| GO:0022408 | negative regulation of cell-cell adhesion                                           | 3.62E-04 |
| GO:0019372 | lipoxygenase pathway                                                                | 3.66E-04 |
| GO:1901700 | response to oxygen-containing compound                                              | 3.72E-04 |
| GO:0048002 | antigen processing and presentation of peptide antigen                              | 3.75E-04 |
| GO:0002700 | regulation of production of molecular mediator of immune response                   | 3.75E-04 |
| GO:0030334 | regulation of cell migration                                                        | 4.03E-04 |
| GO:0043330 | response to exogenous dsRNA                                                         | 4.05E-04 |
| GO:0034341 | response to interferon-gamma                                                        | 4.10E-04 |
| GO:0071827 | plasma lipoprotein particle organization                                            | 4.22E-04 |
| GO:0071310 | cellular response to organic substance                                              | 4.46E-04 |
| GO:1903825 | organic acid transmembrane transport                                                | 4.52E-04 |
| GO:0034367 | macromolecular complex remodeling                                                   | 4.56E-04 |
| GO:0034368 | protein-lipid complex remodeling                                                    | 4.56E-04 |
| GO:0034369 | plasma lipoprotein particle remodeling                                              | 4.56E-04 |
| GO:0036152 | phosphatidylethanolamine acyl-chain remodeling                                      | 4.56E-04 |
| GO:0042886 | amide transport                                                                     | 4.65E-04 |
| GO:0009966 | regulation of signal transduction                                                   | 4.84E-04 |
| GO:1901617 | organic hydroxy compound biosynthetic process                                       | 4.84E-04 |
| GO:0043691 | reverse cholesterol transport                                                       | 5.01E-04 |
| GO:0009070 | serine family amino acid biosynthetic process                                       | 5.01E-04 |
| GO:0006066 | alcohol metabolic process                                                           | 5.06E-04 |
| GO:0006563 | L-serine metabolic process                                                          | 5.10E-04 |
| GO:0019883 | antigen processing and presentation of endogenous antigen                           | 5.10E-04 |
| GO:0002275 | myeloid cell activation involved in immune response                                 | 5.50E-04 |
| GO:1901575 | organic substance catabolic process                                                 | 5.67E-04 |
| GO:0008202 | steroid metabolic process                                                           | 5.70E-04 |
| GO:0009617 | response to bacterium                                                               | 5.71E-04 |
| GO:1902533 | positive regulation of intracellular signal transduction                            | 5.79E-04 |
| GO:0009967 | positive regulation of signal transduction                                          | 6.08E-04 |
| GO:0015711 | organic anion transport                                                             | 6.09E-04 |
| GO:0015804 | neutral amino acid transport                                                        | 6.09E-04 |
| GO:0019731 | antibacterial humoral response                                                      | 6.09E-04 |
| GO:2000145 | regulation of cell motility                                                         | 6.20E-04 |
| GO:0044272 | sulfur compound biosynthetic process                                                | 6.24E-04 |
| GO:0001818 | negative regulation of cytokine production                                          | 6.36E-04 |
| GO:0035584 | calcium-mediated signaling using intracellular calcium source                       | 6.70E-04 |
| GO:0030581 | symbiont intracellular protein transport in host                                    | 6.73E-04 |
| GO:0019060 | intracellular transport of viral protein in host cell                               | 6.73E-04 |
| GO:0051410 | detoxification of nitrogen compound                                                 | 6.73E-04 |
| GO:0051708 | intracellular protein transport in other organism involved in symbiotic interaction | 6.73E-04 |
| GO:0019882 | antigen processing and presentation                                                 | 6.75E-04 |
| GO:0048661 | positive regulation of smooth muscle cell proliferation                             | 6.78E-04 |
| GO:0010035 | response to inorganic substance                                                     | 7.09E-04 |
| GO:0010575 | positive regulation of vascular endothelial growth factor production                | 7.10E-04 |
| GO:0002218 | activation of innate immune response                                                | 7.16E-04 |

|            |                                                              |          |
|------------|--------------------------------------------------------------|----------|
| GO:0071825 | protein-lipid complex subunit organization                   | 7.24E-04 |
| GO:0090196 | regulation of chemokine secretion                            | 7.75E-04 |
| GO:0010646 | regulation of cell communication                             | 7.84E-04 |
| GO:0009108 | coenzyme biosynthetic process                                | 7.92E-04 |
| GO:0023051 | regulation of signaling                                      | 7.99E-04 |
| GO:0002699 | positive regulation of immune effector process               | 8.02E-04 |
| GO:0043299 | leukocyte degranulation                                      | 8.27E-04 |
| GO:0043312 | neutrophil degranulation                                     | 8.30E-04 |
| GO:0043331 | response to dsRNA                                            | 8.58E-04 |
| GO:0032722 | positive regulation of chemokine production                  | 8.58E-04 |
| GO:0002283 | neutrophil activation involved in immune response            | 8.61E-04 |
| GO:0046596 | regulation of viral entry into host cell                     | 8.72E-04 |
| GO:0006520 | cellular amino acid metabolic process                        | 8.77E-04 |
| GO:0032373 | positive regulation of sterol transport                      | 8.78E-04 |
| GO:0032376 | positive regulation of cholesterol transport                 | 8.78E-04 |
| GO:0055094 | response to lipoprotein particle                             | 8.78E-04 |
| GO:0046597 | negative regulation of viral entry into host cell            | 8.78E-04 |
| GO:0006954 | inflammatory response                                        | 8.89E-04 |
| GO:0002274 | myeloid leukocyte activation                                 | 8.89E-04 |
| GO:0006690 | icosanoid metabolic process                                  | 9.01E-04 |
| GO:1901568 | fatty acid derivative metabolic process                      | 9.01E-04 |
| GO:1904951 | positive regulation of establishment of protein localization | 9.21E-04 |
| GO:0040013 | negative regulation of locomotion                            | 9.24E-04 |
| GO:0051222 | positive regulation of protein transport                     | 9.29E-04 |

**Supplementary Table S1c**

| <b>GO Categories of Upregulated Genes in HPV16 Tonsil</b> |                                                 |                |
|-----------------------------------------------------------|-------------------------------------------------|----------------|
| <b>GO Term</b>                                            | <b>Description</b>                              | <b>P-value</b> |
| GO:0022402                                                | cell cycle process                              | 1.25E-12       |
| GO:1903047                                                | mitotic cell cycle process                      | 1.99E-09       |
| GO:0051726                                                | regulation of cell cycle                        | 8.36E-08       |
| GO:0006259                                                | DNA metabolic process                           | 1.61E-07       |
| GO:0051301                                                | cell division                                   | 3.21E-07       |
| GO:0000280                                                | nuclear division                                | 6.09E-07       |
| GO:0007067                                                | mitotic nuclear division                        | 9.92E-07       |
| GO:0048285                                                | organelle fission                               | 1.23E-06       |
| GO:0065004                                                | protein-DNA complex assembly                    | 5.43E-06       |
| GO:0051276                                                | chromosome organization                         | 8.96E-06       |
| GO:0071824                                                | protein-DNA complex subunit organization        | 1.22E-05       |
| GO:0010564                                                | regulation of cell cycle process                | 1.57E-05       |
| GO:0006260                                                | DNA replication                                 | 1.79E-05       |
| GO:1903046                                                | meiotic cell cycle process                      | 2.20E-05       |
| GO:0006281                                                | DNA repair                                      | 2.47E-05       |
| GO:0006336                                                | DNA replication-independent nucleosome assembly | 3.02E-05       |

|                                                             |                                                                   |                |
|-------------------------------------------------------------|-------------------------------------------------------------------|----------------|
| GO:0034724                                                  | DNA replication-independent nucleosome organization               | 3.25E-05       |
| GO:0006996                                                  | organelle organization                                            | 7.05E-05       |
| GO:0006334                                                  | nucleosome assembly                                               | 1.01E-04       |
| GO:0006270                                                  | DNA replication initiation                                        | 1.85E-04       |
| GO:0034728                                                  | nucleosome organization                                           | 2.33E-04       |
| GO:0006333                                                  | chromatin assembly or disassembly                                 | 2.40E-04       |
| GO:0007059                                                  | chromosome segregation                                            | 2.50E-04       |
| GO:0034080                                                  | CENP-A containing nucleosome assembly                             | 3.81E-04       |
| GO:0000082                                                  | G1/S transition of mitotic cell cycle                             | 4.65E-04       |
| GO:0044843                                                  | cell cycle G1/S phase transition                                  | 4.81E-04       |
| GO:0031055                                                  | chromatin remodeling at centromere                                | 4.98E-04       |
| GO:0006974                                                  | cellular response to DNA damage stimulus                          | 5.05E-04       |
| GO:0046605                                                  | regulation of centrosome cycle                                    | 5.31E-04       |
| GO:0034622                                                  | cellular macromolecular complex assembly                          | 7.25E-04       |
| GO:0043486                                                  | histone exchange                                                  | 7.56E-04       |
| GO:0051383                                                  | kinetochore organization                                          | 8.51E-04       |
| GO:0071103                                                  | DNA conformation change                                           | 8.59E-04       |
| GO:0072091                                                  | regulation of stem cell proliferation                             | 9.84E-04       |
| GO:0046599                                                  | regulation of centriole replication                               | 9.90E-04       |
|                                                             |                                                                   |                |
| <b>GO Categories of Downregulated Genes in HPV16 Tonsil</b> |                                                                   |                |
| <b>GO Term</b>                                              | <b>Description</b>                                                | <b>P-value</b> |
| GO:0030198                                                  | extracellular matrix organization                                 | 9.64E-07       |
| GO:0043062                                                  | extracellular structure organization                              | 9.92E-07       |
| GO:0031581                                                  | hemidesmosome assembly                                            | 7.48E-06       |
| GO:0008544                                                  | epidermis development                                             | 1.07E-05       |
| GO:0007155                                                  | cell adhesion                                                     | 4.44E-05       |
| GO:0022610                                                  | biological adhesion                                               | 4.70E-05       |
| GO:0042127                                                  | regulation of cell proliferation                                  | 6.60E-05       |
| GO:0030335                                                  | positive regulation of cell migration                             | 6.82E-05       |
| GO:0050921                                                  | positive regulation of chemotaxis                                 | 7.62E-05       |
| GO:0032967                                                  | positive regulation of collagen biosynthetic process              | 7.78E-05       |
| GO:0010714                                                  | positive regulation of collagen metabolic process                 | 8.87E-05       |
| GO:0044253                                                  | positive regulation of multicellular organismal metabolic process | 8.87E-05       |
| GO:2000147                                                  | positive regulation of cell motility                              | 8.94E-05       |
| GO:0051272                                                  | positive regulation of cellular component movement                | 1.06E-04       |
| GO:0030334                                                  | regulation of cell migration                                      | 1.25E-04       |
| GO:0090023                                                  | positive regulation of neutrophil chemotaxis                      | 1.27E-04       |
| GO:0001887                                                  | selenium compound metabolic process                               | 1.30E-04       |
| GO:0040017                                                  | positive regulation of locomotion                                 | 1.41E-04       |
| GO:0006954                                                  | inflammatory response                                             | 1.48E-04       |
| GO:0022617                                                  | extracellular matrix disassembly                                  | 1.61E-04       |



|            |                                                          |          |
|------------|----------------------------------------------------------|----------|
| GO:0048870 | cell motility                                            | 1.74E-04 |
| GO:0071624 | positive regulation of granulocyte chemotaxis            | 1.75E-04 |
| GO:1902624 | positive regulation of neutrophil migration              | 1.75E-04 |
| GO:0032965 | regulation of collagen biosynthetic process              | 1.75E-04 |
| GO:0090022 | regulation of neutrophil chemotaxis                      | 2.13E-04 |
| GO:1901342 | regulation of vasculature development                    | 2.18E-04 |
| GO:0002690 | positive regulation of leukocyte chemotaxis              | 2.28E-04 |
| GO:2000145 | regulation of cell motility                              | 2.29E-04 |
| GO:0010712 | regulation of collagen metabolic process                 | 2.79E-04 |
| GO:1902622 | regulation of neutrophil migration                       | 2.79E-04 |
| GO:0044246 | regulation of multicellular organismal metabolic process | 3.03E-04 |
| GO:0050920 | regulation of chemotaxis                                 | 3.28E-04 |
| GO:0016477 | cell migration                                           | 3.47E-04 |
| GO:0044763 | single-organism cellular process                         | 3.81E-04 |
| GO:0060326 | cell chemotaxis                                          | 3.98E-04 |
| GO:0007044 | cell-substrate junction assembly                         | 4.15E-04 |
| GO:0032940 | secretion by cell                                        | 4.33E-04 |
| GO:0051270 | regulation of cellular component movement                | 4.41E-04 |
| GO:0032496 | response to lipopolysaccharide                           | 4.47E-04 |
| GO:0002688 | regulation of leukocyte chemotaxis                       | 4.50E-04 |
| GO:0040011 | locomotion                                               | 4.58E-04 |
| GO:0040012 | regulation of locomotion                                 | 4.59E-04 |
| GO:0006935 | chemotaxis                                               | 5.42E-04 |
| GO:0042330 | taxis                                                    | 5.52E-04 |
| GO:0071622 | regulation of granulocyte chemotaxis                     | 5.89E-04 |
| GO:0002237 | response to molecule of bacterial origin                 | 5.95E-04 |
| GO:0090303 | positive regulation of wound healing                     | 6.28E-04 |
| GO:0002687 | positive regulation of leukocyte migration               | 6.96E-04 |
| GO:1903036 | positive regulation of response to wounding              | 9.52E-04 |
| GO:0033993 | response to lipid                                        | 9.84E-04 |

Supplementary Figure S1: Protein interaction networks depict metabolism related pathways enriched in the HPV16 cervical (a) and foreskin (b) tissue, among the upregulated genes. (a) Highlighted in yellow and green are proteins involved in phosphate metabolism and amino acid biosynthesis, respectively. (b) Highlighted in peach are proteins with overlapping functions in glycolysis, gluconeogenesis and amino acid biosynthesis.

a. Upregulated Genes HPV16 cervical tissue

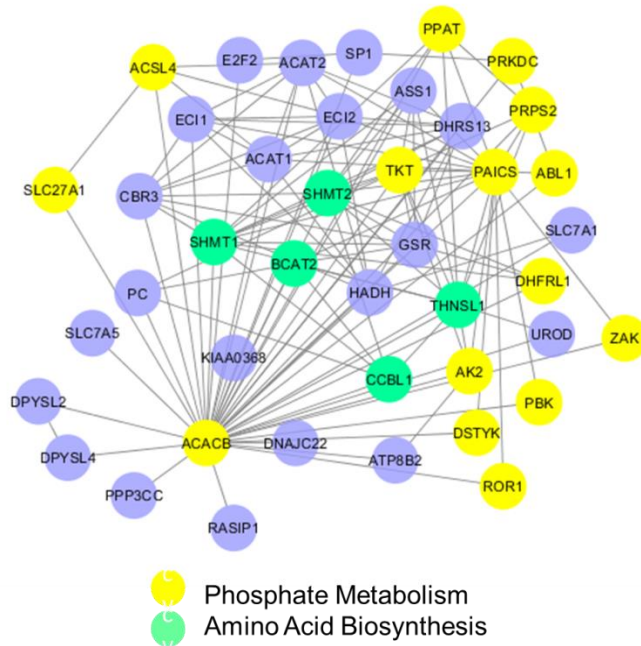

b. Upregulated Genes in HPV16 foreskin tissue

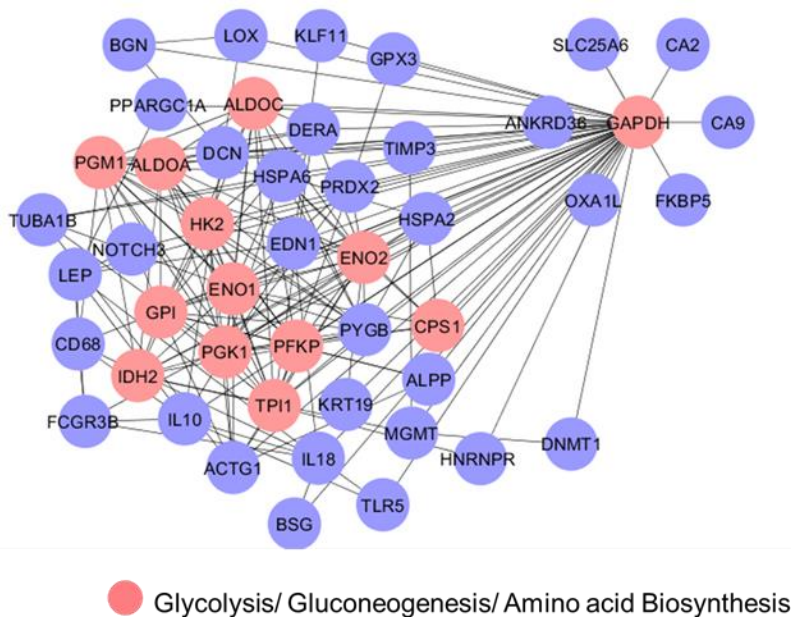

Supplementary Figure S2: Protein interaction network depicts Fanconi Anemia pathway and DNA repair proteins to be upregulated in the HPV16 foreskin tissue.

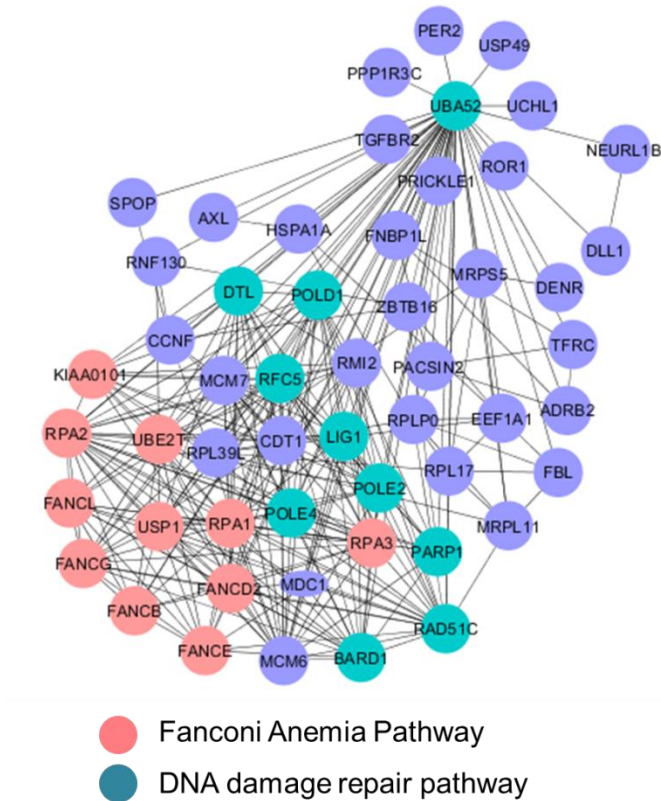

Table S2: Fanconi Anemia Complementation Group (FANC) genes upregulated in the HPV16 cervical, foreskin and tonsil tissue. The fold changes are included within brackets.

| HPV16 Cervix  | HPV16 Foreskin | HPV16 Tonsil |
|---------------|----------------|--------------|
| FANCC (1.68)  | FANCB (2.16)   | FANCE (1.74) |
| FANCD2 (2.06) | FANCD2 (1.63)  |              |
| FANCE (4.18)  | FANCE (1.55)   |              |
|               | FANCG (1.99)   |              |
|               | FANCL (1.65)   |              |

Supplementary Table S3: Table shows the progeny virus titers obtained from the rafts used for RT-PCR and western blot validation experiments. Virus titers were determined using established protocols in the laboratory, from rafts harvested at D20.

| <b>Raft Identification</b> | <b>No. of virus particles per raft</b> |
|----------------------------|----------------------------------------|
| HPV16 Cervical raft #1     | $9.38 \times 10^7$                     |
| HPV16 Cervical raft #2     | $5.25 \times 10^8$                     |
| HPV16 Foreskin raft #1     | $7.7 \times 10^6$                      |
| HPV16 Foreskin raft #2     | $3.15 \times 10^7$                     |
| HPV16 Tonsil raft #1       | $3.6 \times 10^7$                      |
| HPV16 Tonsil raft #2       | $4.28 \times 10^7$                     |

Supplementary Figure S3: Western blot analysis for KRT14, KRT19, KRT23 and GPER from D20 rafts of uninfected and infected cervix, foreskin and tonsil. Cell lysates from two uninfected and HPV16 infected rafts were used for western blot analysis. (a) Representative western blots indicating the protein levels of KRT14, KRT19, KRT23 and GPER. GAPDH is used as a loading control. (b) The histograms represent average expression levels of the proteins normalized to GAPDH levels (Mean + SEM), for each of the tissue types, obtained from at least three independent experiments. \* indicates p value<0.05.

**a**

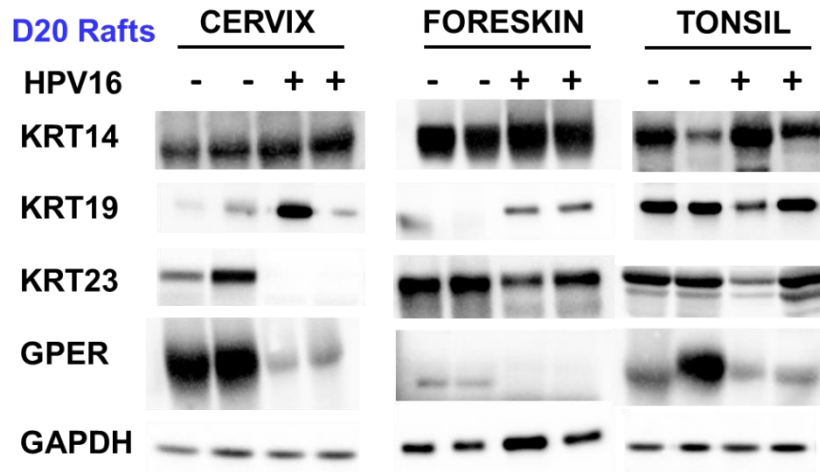

**b**

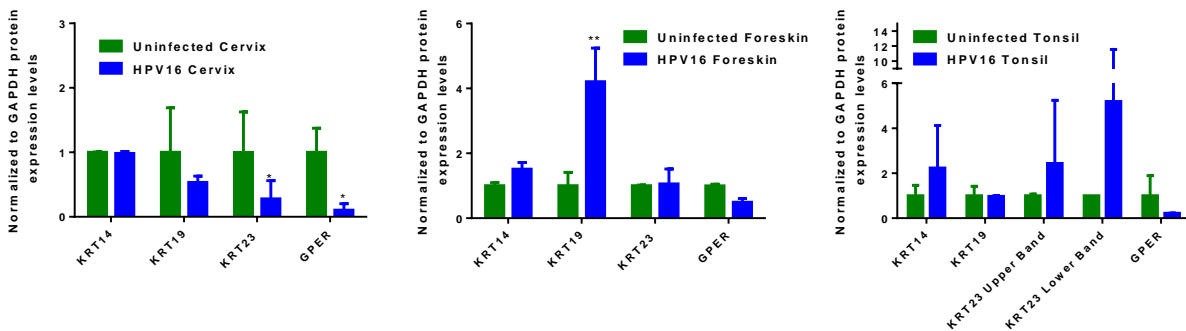

Supplementary Figure S4: Western Blot showing SMAD3/pSMAD3 expression levels in rafts harvested at D20 from uninfected and HPV16 infected cervical, foreskin and tonsil tissue. Cell lysates from two uninfected and HPV16 infected rafts for each tissue types, were used for western blot analysis. (a) Representative blot images showing protein expression levels of SMAD3, pSMAD3 in the uninfected and HPV16 positive cervix, tonsil and foreskin rafts. GAPDH is used as a loading control. (b) Histograms represent average ratios of SMAD3 and pSMAD3 levels normalized to GAPDH (Mean + SEM), obtained from at least three independent experiments. \* indicates p value<0.05.

**a**

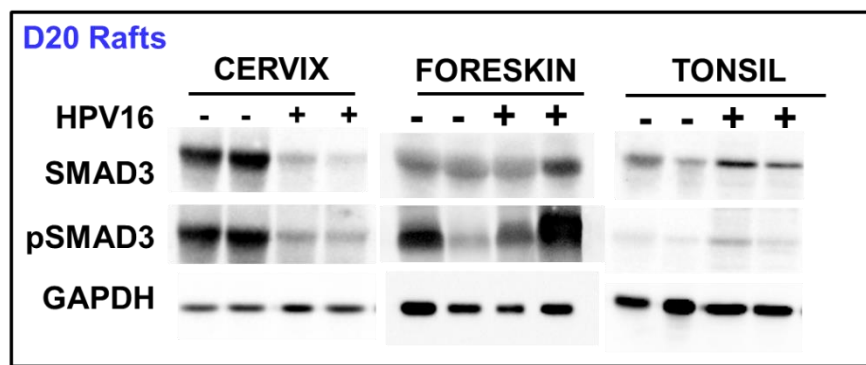

**b**

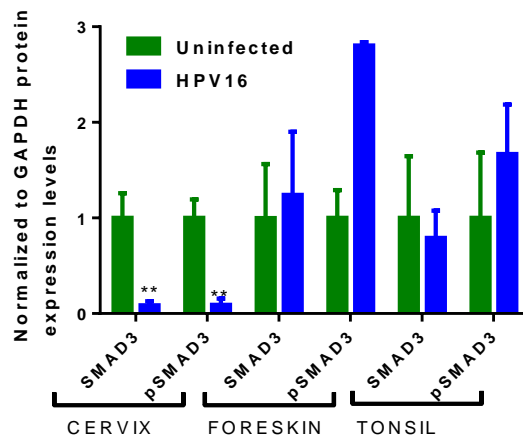

Supplement: JVI.00915-19-s0001.pdf [file JVI.00915-19-s0001.pdf]
